# Supplementary material for: Associations of the Hemoglobin-to-red blood cell distribution width ratio with Parkinson's Disease: the mediating role of systemic inflammation response index
Source: Research Square preprint supplement (doi:10.21203/rs.3.rs-7428379/v1), 2025-12-22
Supplement: Supplementary file 1 [file b6bfabf62e87f7fb569d1f65.docx]

Supplementary Material

| Covariates | Description in NHANES |
| --- | --- |
| Age | Divided into three groups: 20-40 years old, 41-60  years old, >60 years old |
| Race | Mexican American, Non-Hispanic Black, Non-Hispanic White, Other Race |
| Sex | Male and Female |
| Marital status | Yes: Married/Living with partner |
| Poverty-income ratio | Poor: <1.3; Not Poor:>=1.3 |
| Educational level | Below high school, High School or above |
| Hyperlipidemia | (1) Triglyceride (TG) levels ≥150 mg/dl (1.7 mmol/L);(2) Total cholesterol (TC) levels ≥200 mg/dl (5.18 mmol/L);(3) Low-density lipoprotein (LDL) levels ≥130 mg/dl (3.37 mmol/L);(4) High-density lipoprotein (HDL) levels: Men: <40 mg/dl (1.04 mmol/L); Women: <50 mg/dl (1.30 mmol/L); (5) Individuals taking cholesterol-lowering drugs are also considered hyperlipidemia. |
| Diabetes | Diabetes was defined as a history of previous diabetes, HbA1c level ≥6.5%, or fasting blood glucose level ≥126 mg/dL |
| Hypertension | The diagnostic criteria consist of self-reported hypertension history, the utilization of antihypertensive medication, a systolic blood pressure (SBP) ≥ 140mmHg, or a diastolic blood pressure (DBP) ≥ 90mmHg |

**Table S1.** Description of covariates
